1 **The RNA helicase DDX5 promotes alveolar rhabdomyosarcoma growth**  
2 **and survival**

3

4 Alberto Gualtieri<sup>1</sup>, Valerio Licursi<sup>2</sup> and Chiara Mozzetta<sup>1#</sup>.

5

6 1. Institute of Molecular Biology and Pathology (IBPM), National Research Council (CNR)  
7 of Italy c/o Department of Biology and Biotechnology “C. Darwin”, Sapienza University,  
8 00185 Rome, Italy

9 2. Department of Biology and Biotechnology “C. Darwin”, Sapienza University, 00185  
10 Rome, Italy

11

12 #Correspondence: [chiara.mozzetta@uniroma1.it](mailto:chiara.mozzetta@uniroma1.it) (C.M)

13

14 **Abstract**

15 Rhabdomyosarcoma (RMS) is the most common soft-tissue sarcoma of childhood  
16 characterized by the inability to exit the proliferative myoblast-like stage. The alveolar  
17 fusion positive subtype (FP-ARMS) is the most aggressive and is mainly caused by the  
18 expression of PAX3/7-FOXO1 oncoproteins, which are challenging pharmacological  
19 targets. Thus, other therapeutic vulnerabilities resulting from gene expression changes  
20 are progressively being recognized. Here, we identified the DEAD box RNA helicase 5  
21 (DDX5) as a potential therapeutic target to inhibit FP-ARMS growth. We show that DDX5  
22 is overexpressed in alveolar RMS cells, demonstrating that its depletion drastically  
23 decreases FP-ARMS viability and slows tumor growth in xenograft models.  
24 Mechanistically, we provide evidence that DDX5 functions upstream the G9a/AKT  
25 survival signalling pathway, by modulating G9a protein stability. Finally, we show that  
26 G9a interacts with PAX3-FOXO1 and regulates its activity, thus sustaining FP-ARMS  
27 myoblastic state. Together, our findings identify a novel survival-promoting loop in FP-  
28 ARMS and highlight DDX5 as potential therapeutic target to arrest rhabdomyosarcoma  
29 growth.

30

31 **Keywords**

32 Rhabdomyosarcoma, DDX5, PAX3-FOXO1, tumor growth, G9a.

33

34

35

36

37

38

39

40

## 41 **Introduction**

42 Rhabdomyosarcomas (RMS) are aggressive childhood cancers representing the most  
43 common soft-tissue sarcomas in pediatric population. Around 60% of all children and  
44 adolescents diagnosed with RMS are cured by currently available multimodal therapies,  
45 including surgery, radiation and conventional chemotherapeutic drugs. However, clinical  
46 outcomes for patients with high-risk RMS are still poor, emphasizing the urgency to  
47 explore more in depth its molecular underpinnings and to devise new effective  
48 therapeutic interventions (1).

49 Pediatric RMS are typically divided into two major categories: alveolar (ARMS) and  
50 embryonal (ERMS). These two types of RMS are clinically and molecularly different.  
51 ERMS are more common, histologically resemble embryonic skeletal muscle, arise early  
52 in childhood from head, neck and retroperitoneum, and are typically associated with  
53 better prognosis. The genetic profile of ERMS is heterogeneous and is associated with  
54 activation of various tumor-promoting signaling pathways and/or loss of tumor  
55 surveillance. ARMS are most common in older children, predominantly involve trunk and  
56 extremities and are generally more aggressive. They typically associate with  
57 pathognomonic chromosomal translocations, such as t(2;13) or t(1;13) that result in  
58 fusion proteins combining the DNA binding domain of PAX3 or PAX7 with the  
59 transcriptional activation domain of FOXO1A, which account for the 60% or 20% ARMS  
60 cases, respectively. The remaining 20% of ARMS lack molecular evidence of these  
61 translocations and are referred to as fusion-negative ARMS (2).

62 Alveolar fusion-positive (FP-ARMS) is the most aggressive subtype, associated with  
63 frequent metastasis at the time of diagnosis and limited response to treatment, resulting  
64 in poor survival rates. FP-RMS cells are addicted to the oncogenic capacity of PAX3/7-  
65 FOXO1, which have become very important prognostic markers in the clinics. However,  
66 direct targeting of the fusion proteins is still a challenge (3) and other therapeutic  
67 vulnerabilities resulting from gene expression changes are being extensively

68 investigated in the last years (4-7). In this context, DEAD box RNA helicases appear  
69 appealing candidates as potential therapeutic targets, having been implicated in almost  
70 every aspect of RNA metabolism, including transcription, pre-mRNA splicing, ribosome  
71 biogenesis, transport, translation, and RNA decay (8).

72 In normal myogenesis, the DEAD box helicase 5 (DDX5, also known as p68) is needed  
73 for proper differentiation, being part of a multitasking complex that together with the  
74 steroid nuclear receptor activator (*SRA*) long-non coding RNA, BRG1 and MYOD,  
75 promotes transcriptional expression of MYOD-target genes (9). Moreover, DDX5  
76 cooperates with heterogeneous nuclear ribonucleoprotein (hnRNP) to establish specific  
77 splicing subprograms in myoblasts along myogenesis (10), highlighting its multimodal  
78 actions in shaping the gene expression programs during cell differentiation. Many studies  
79 have detected the overexpression of DDX5 in different human malignancies and  
80 confirmed its involvement in tumorigenesis, invasion, proliferation and metastasis (11-  
81 13). Thus, DDX5 is a potentially valuable diagnostic and prognostic marker in cancer.  
82 However, whether DDX5 plays a role in rhabdomyosarcoma pathogenesis has been not  
83 addressed yet. Here, we demonstrate that DDX5 is overexpressed in FP-ARMS and that  
84 it promotes their survival and growth, both *in vitro* and *in vivo*. Mechanistically, we found  
85 that DDX5 interacts and cooperates with the lysine methyltransferase G9a to stabilize  
86 PAX3-FOXO1 thus sustaining the myoblastic stage of FP-ARMS.

87

## 88 **Results and Discussion**

### 89 **DDX5 is overexpressed in rhabdomyosarcoma and sustains FP-ARMS survival**

90 To gain insights into a possible role of DDX5 in RMS, we looked at its expression and  
91 epigenetic status through the Integrated Rhabdomyosarcoma database of the St. Jude  
92 Children's Research Hospital (<https://pecan.stjude.cloud/proteinpaint/study/RHB2018>)  
93 (14). Among the 18 chromatin hidden Markov modeling (chromHMM) states (15)  
94 identified in the study (14) (**Supplemental Figure. 1A**), DDX5 showed a strong active  
95 transcription start site (TSS) (red bars) and an actively transcribed gene body (green  
96 bars) in either normal myoblasts and myotubes, and primary ERMS and ARMS samples  
97 (**Supplemental Figure 1B**). Accordingly, *DDX5* RNA levels (*DDX5* FPKM) did not  
98 significantly differ among normal and RMS samples (**Figure 1A, blue bars**). By contrast,  
99 proteomic data revealed that DDX5 protein levels were higher than normal cells in all  
100 tested RMS samples (**Figure 1A, red bars**), which were also accompanied by an  
101 hyperphosphorylated status of DDX5 as compared to normal myoblasts (**Figure 1A,**  
102 *circles*). Experimental analysis of DDX5 expression, by quantitative real-time PCR (qRT-  
103 PCR) (**Figure 1B**) and Western blot (WB) (**Figure 1C**), on two different FP-ARMS cell  
104 lines, RH30 and RH41, confirmed DDX5 overexpression in FP-ARMS, as compared to  
105 normal human skeletal muscle myoblasts (HSMMs), prompting our interest in  
106 investigating its functional role.

107 To this end, we inhibited DDX5 expression in FP-ARMS cells through small interfering  
108 RNA (siRNA)-mediated knock-down (KD). RH30 and RH41 cells were transfected with  
109 two different siRNA against DDX5 or with scramble siRNAs as control (siCTR). As  
110 demonstrated by qRT-PCR (**Figure 1D**) and western blot (**Figure 1E**) analysis, both  
111 siRNAs efficiently depleted DDX5 in both cell lines. A growth curve performed on both  
112 RH30 (**Figure 1F, right panel**) and RH41 (**Figure 1F, left panel**), demonstrated that  
113 DDX5 depletion significantly reduced FP-RMS growth, as compared to control cells

114 (siCTR). An effect that was visible by morphological inspection upon 72 hrs after  
115 treatment, (**Figure 1G**). Western blot analysis for the apoptotic markers cleaved PARP  
116 and cleaved caspase 7 (**Figure 1H**), clearly demonstrated the induction of programmed  
117 cell death in FP-ARMS upon reduction of DDX5 expression. Taken together, these data  
118 led us to conclude that overexpression of DDX5 sustains FP-RMS growth and survival.

119

### 120 **DDX5 promotes AKT signaling stabilizing G9a in FP-RMS**

121 To gain further insights into the mechanism behind DDX5 role in sustaining FP-RMS  
122 survival, we performed transcriptional profiling by RNA-seq in siDDX5 Rh30 cells, as  
123 compared to siCTR-transfected cells (**Figure 2A**). Notably, enrichment analysis of the  
124 differentially expressed genes (DEGs;  $p < 0.05$ ,  $FC > 1.5$ ) found “regulation of RAS protein  
125 signal transduction” among categories enriched in down-regulated transcripts (**Figure**  
126 **2B**). This evidence caught our attention, as RAS pathway is one of the most de-regulated  
127 in both FN-RMS and FP-RMS (16). Its predominant downstream signaling pathways,  
128 such as the RAF–MEK (mitogen-activated protein kinase (MAPK) kinase–ERK  
129 (extracellular signal–regulated kinase) MAPK pathway and the phosphatidylinositol 3-  
130 kinase (PI3-kinase)–AKT–mammalian target of rapamycin (mTOR) pathway), are key to  
131 maintain cell growth and proliferation, which is why their inhibition is being tested to arrest  
132 cancer cell survival (17), with positive effects reported also in RMS (18). Of note, KEGG  
133 analysis of ‘RAS signaling’ pathway (**Figure 2C, left panel**) indicated that among its  
134 downstream cascades, the ‘Akt signaling’ pathway was the one affected by DDX5  
135 depletion. Accordingly, KEGG on the specific ‘PI3K-Akt signaling’ pathway highlighted  
136 downregulation of *AKT* (**Figure 2C, right panel**). *AKT* is involved in cell survival and  
137 proliferation, through the mTOR pathway (19), and in apoptosis inhibition by blocking the  
138 FOXO cascade (20). To validate this finding, we performed qRT-PCR for *AKT* on RH30  
139 cell lines after 3 days siDDX5 treatment, demonstrating a significant reduction of *AKT*  
140 mRNA levels as compared to siCTR cells (**Figure 2D**). Moreover, by western blot

141 analysis we demonstrated that *DDX5* silencing induced a significant reduction of the  
142 protein levels of AKT and, consequently, of p-AKT, the fully activated form of the kinase  
143 phosphorylated on Thr 308 and Ser 473 (**Figure 2E**). These data agree with recent work  
144 demonstrating that *DDX5* promotes hepatocellular carcinoma cell growth *via* AKT  
145 pathway (21), supporting a similar role for *DDX5* in sustaining FP-ARMS growth and  
146 survival.

147 It has been recently reported that AKT signaling is also pathogenically activated in FP-  
148 ARMS by the lysine methyltransferase G9a (22), an evidence that led us to hypothesize  
149 that *DDX5* and G9a might exert their function *via* a common regulatory axis on AKT. To  
150 investigate for this potential cooperation, we performed co-immunoprecipitation studies  
151 in RH41 cells in control condition (shCTR) and in cells depleted of G9a (by short-hairpin  
152 RNA against G9a, shG9a). As shown in **Figure 2F**, we demonstrated the presence of  
153 *DDX5* in the immunoprecipitation of G9a, which was reduced in cells with decreased  
154 levels of G9a, confirming the specificity of the interaction (**Figure 2F**). In further support  
155 for a possible cooperation between G9a and *DDX5*, we showed that G9a depletion in  
156 FP-ARMS cells phenocopied the downregulation of *DDX5*. Indeed, shG9a FP-ARMS  
157 displayed growth arrest (**Supplemental Figure 2A-B**); and an increased expression of  
158 apoptotic markers (**Supplemental Figure 2C**). Then, to better investigate the  
159 relationship between *DDX5* and G9a, we studied their reciprocal modulation. While G9a  
160 reduction had no effect on *DDX5* protein levels (**Figure 2F**, *input lanes*), we observed  
161 that depletion of *DDX5* led to a significant reduction of G9a protein in RH41 cells (**Figure**  
162 **2G**). Since G9a mRNA levels did not significantly decreased after *DDX5* silencing  
163 (**Figure 2H**), our results suggest that *DDX5* regulates G9a post-transcriptionally. In  
164 agreement with this idea, it has been recently demonstrated that *DDX5* is involved in the  
165 alternative splicing of *G9a* transcripts in spermatogonia (23) a mechanism that has been  
166 also shown to affect the stability of different G9a isoforms during neuronal differentiation  
167 (24). These results lead to speculate that *DDX5* might be involved in the control of *G9a*

168 splicing also in FP-ARMS, likely stabilizing specific isoforms and ultimately affecting G9a  
169 protein stability.

170 Taken together, our data indicate that DDX5 function upstream of G9a to promote cell  
171 growth and survival, at least in part, via AKT modulation.

172

173 **G9a regulates PAX3-FOXO1 protein stability thus sustaining FP-RMS myoblastic**  
174 **state**

175 FP-RMS are addicted to the oncogenic capacity of PAX3-FOXO1, which has been firmly  
176 implicated in perpetuating the myoblastic proliferative state of RMS cells (7). In light of  
177 our results showing that DDX5 and G9a downregulation disrupt this survival-promoting  
178 loop, we decided to investigate whether DDX5 and G9a could be involved in the PAX3-  
179 FOXO1 modulation.

180 Of note, depletion of both *DDX5* (**Figure 3A**) and G9a (**Figure 3B**) caused a marked  
181 reduction of PAX3-FOXO1 protein; while PAX3-FOXO1 mRNA levels remained  
182 unaffected (**Supplemental Figure 3A**), pointing towards a post-transcriptional  
183 regulation. Since PAX3-FOXO1 reduction was observed also upon G9a depletion, a  
184 condition in which DDX5 levels are unaffected (**Figure 2F**), we hypothesized that G9a is  
185 the major regulator of PAX3-FOXO1 oncoprotein in this axis. In agreement with this idea,  
186 inhibition of G9a enzymatic activity by treatment with two specific small molecule  
187 inhibitors, A366 (**Figure 3C**) and UNC0642 (**Figure 3D**), exerted similar effects on PAX3-  
188 FOXO1 levels, further suggesting that G9a mediates PAX3-FOXO1 stability via its  
189 enzymatic activity. Accordingly, we found that G9a interacted with PAX3-FOXO1 in two  
190 different FP-RMS cell lines (**Figure 3E**), and this interaction was reduced in cells treated  
191 with the G9a inhibitor A-366 (**Figure 3F**). As G9a has a well-known role in methylating  
192 non-histone proteins, and lysine methylation promotes protein stability (25), these results  
193 strongly suggest that G9a might stabilize PAX3-FOXO1 through methylation. In further  
194 support of this, transcriptomic analysis by RNA-seq revealed that G9a depletion in FP-



195 ARMS cells (**Supplemental Figure 3B**) induced transcriptional changes inversely  
196 correlated by those imposed by PAX3-FOXO1 expression (26, 27), as revealed by Gene  
197 Set Enrichment Analysis (GSEA) (**Figure 3G**). Accordingly, transcript levels of known  
198 PAX3-FOXO1 target genes were reduced in G9a KD cells (**Figure 3H**). Further, it has  
199 been previously shown that PAX3-FOXO1 activates the RMS master transcription  
200 factors (MTFs) MYOD1 and Myogenin, and together with them establishes the  
201 epigenome and transcriptional signatures of FP-RMS (7). Strikingly, G9a down-  
202 regulation (**Figure 3I,L**) and pharmacological inhibition (**Figure 3M**) was sufficient to  
203 induce a strong reduction of MYOD1 and Myogenin expression, both at the RNA (**Figure**  
204 **3I**) and protein (**Figure 3L,M**) levels. This was confirmed by GSEA that revealed a  
205 striking negative correlation of transcripts belonging to the “Myogenesis” hallmark in G9a  
206 depleted cells (**Supplemental Figure 3C**), as compared to control. Taken together,  
207 these evidences strongly indicate that G9a activity promotes the PAX3-FOXO1-induced  
208 myoblastic RMS stage stabilizing the stability of the oncoprotein.

209

### 210 **DDX5 promotes FP-RMS growth *in vivo***

211 Our results identified the existence of a three-component regulation axis in which DDX5  
212 functions upstream of G9a and PAX3-FOXO1 to sustain FP-ARMS survival. To  
213 unequivocally demonstrate a role of DDX5 in mediating FP-ARMS tumorigenesis *in vivo*,  
214 we performed xenografts experiments. To this end, we subcutaneously injected both  
215 control (shCtr) and DDX5 depleted RH30 cells (shDDX5) into the flanks of BALB/c Nude  
216 mice. Consistent with our *in vitro* data, tumors derived from shDDX5 displayed a  
217 significantly reduced growth over time as compared to those derived from control cells  
218 (shCtr) (**Figure 4A**); and excised tumors were much smaller than controls (**Figure 4B**).  
219 Moreover, immunohistological analysis demonstrated that shDDX5 isolated tumors  
220 displayed a significant reduced number of proliferating (Ki67+) cells, as compared to  
221 those derived from control (shCtr) cells (**Figure 4C**). These results are consistent with

222 the growth inhibition we previously observed *in vitro* and demonstrate that DDX5 plays  
223 a crucial role in FP-RMS growth *in vivo*. Moreover, western blot analysis on xenografts-  
224 derived protein extracts confirmed our *in vitro* data, showing a DDX5-dependent  
225 expression of G9a and PAX3-FOXO1 in RMS tumors (**Figure 4D-E**), confirming that  
226 DDX5 downregulation also reduces pAKT, AKT and MYOD1 protein (**Figure 4E**) levels  
227 *in vivo*.

228 In sum, our data identify a major role for DDX5 in sustaining FP-ARMS survival and  
229 designate it as a possible novel therapeutic target for rhabdomyosarcoma. DDX5 ha  
230

## 231 **Methods**

### 232 **Cell lines**

233 All cell lines were maintained in a humidified incubator at 37°C with 5% CO<sub>2</sub>. Primary  
234 human skeletal muscle myoblasts (HSMMs) were cultured in growth medium (SkGM-2  
235 Bullet Kit, Lonza). HEK293T cells (kindly gifted by Slimane Ait-Si-Ali lab) for the  
236 production of lentiviral particles were cultured in Dulbecco's modified Eagle's medium  
237 (DMEM) (Sigma-Aldrich, D5671), supplemented with 10% FBS (Corning, 35-015-CV), 2  
238 mM L-glutamine and 100 U/ml penicillin/ streptomycin. ARMS cell lines RH30 and RH41  
239 were kindly provided by Rossella Rota (Bambino Gesù Children's Hospital, Rome, Italy).  
240 RH30 and RH41 were maintained in RPMI 1640 with L-glutamine (Sigma-Aldrich,  
241 R8758,) supplemented with with 1% penicillin/streptomycin and 10% FBS (Corning, 35-  
242 015-CV). Cells were treated with 2 $\mu$ M UNC0642 and 10  $\mu$ M A366 (Sigma-Aldrich,  
243 SML1410-25MG) Control cells were treated with equivalent concentrations of DMSO  
244 (Sigma-Aldrich). Several first passage aliquots of each cell line were stored in liquid  
245 nitrogen for subsequent assays.

246

### 247 **Cells transfection**

248 RH30 and RH41 cells were transfected with 100nM of human DDX5 specific siRNA  
249 (siDDX5 #1 and siDDX5 #2, Sigma-Aldrich) or scrambled control siRNA (siCTR) (siRNA  
250 universal negative control, Sigma-Aldrich) using Lipofectamine 2000 (Invitrogen)  
251 according to the manufacturer's protocol. Transfection with siRNAs was executed when  
252 cultured cells reached a confluency of 60% in 6 well plates. Transfection was carried out  
253 according to our adapted protocol in RPMI growth medium for 4-6 hours at 37°C.  
254 Transfection was then stopped by removing the growth medium and replacing it with  
255 RPMI with 10% fetal bovine serum. RNA or protein were isolated 72 h post-transfection  
256 for all assays. The targeted sense and antisense strands are shown below:

257 siDDX5 #1  
258 Sense: 5'-AACCGCAACCAUUGACGCCAU-3'  
259 Antisense: 5'-AUGGCGUCA AUGGUUGCGGUU-3'

260 siDDX5 #2  
261 Sense: 5'-GGCUAGAUGUGGAAGAUGU-3'  
262 Antisense: 5'-ACAUCUCCACAUCUAGCC-3'

263

## 264 **Short hairpin (sh)RNA lentivirus production and cell infections**

265 Lentiviruses were produced in HEK293T packaging cells seeded in 100 mm culture  
266 dishes and transfected in 10ml of DMEM medium, using lipofectamine 2000 (Thermo  
267 Fisher Scientific), with lentiviral packaging vectors psPAX2 (7 µg; Addgene) and pMD2.G  
268 (3,5 µg; Addgene) and 10 µg lentiviral expression constructs shRNA pLKO.1-puro (G9a  
269 Mission shRNA, Sigma-Aldrich, TRCN0000115671, NM\_025256,); For DDX5  
270 knockdown the custom sequence AACCGCAACCAUUGACGCCAU (Sigma-Aldrich  
271 DDX5 Mission shRNA plasmid DNA, NM\_004396.) was cloned in the pLKO.1-puro  
272 vector. The non-silencing shCTR (mission control shRNA plasmid DNA) was purchased  
273 from Sigma aldrich. Transfection medium was replaced 24 h later with new complete  
274 DMEM and 48 h after transfection the lentiviral containing medium was collected, spun  
275 to remove cell debris, and the supernatant filtered through a 0.45 µm low protein binding  
276 filters. Viral aliquots immediately stored at -80°C. RH30 and RH41 target cells were  
277 plated in a 100 mm dish (1,5x10<sup>6</sup> cells) and, 24 h later, were infected with lentiviral  
278 pLKO.1-puro vectors expressing specific shRNA sequences for 24 h in the presence of  
279 polybrene (8µg/ml; Sigma-Aldrich). After further 24 hrs, RH30 and RH41 cells were  
280 selected with 1 µg/ml puromycin (Sigma-Aldrich, P8833) for 3 days. Cells were harvested  
281 at different time points for subsequent experiments. All shRNAs were obtained from  
282 Sigma Aldrich.

283

## 284 **In vitro proliferation assays**

285 Cells transfected with siRNA DDX5 and cells transduced with lentivirus shRNA G9a were  
286 seeded in 6-well plates ( $1.8 \times 10^5$  cells per well) and cell proliferation was evaluated by  
287 counting trypsinized cultures at 1, 2 and 3 days in RH30 and RH41 cells.

288

### 289 **RNA extraction and Quantitative real time PCR (qRT-PCR)**

290 Cells were harvested and centrifuged at 3000 rpm for 5 min at 4°C. Supernatant was  
291 then removed and cell pellet was resuspended in 1 ml of ice-cold PBS and centrifuged  
292 at 2000 rpm for 5 min at 4°C. After removing the supernatant, cell pellet was  
293 resuspended in 1 mL of TRI Reagent (Sigma aldrich) and RNA extraction was carried  
294 out following manufacturer's protocol. Quantity of RNA samples were assessed with  
295 NanoDrop analysis (NanoDrop Technologies). cDNA synthesis was performed using a  
296 High Capacity cDNA Reverse Transcription Kits (Applied Biosystems). qRT-PCR was  
297 performed with a StepOne plus Real-Time PCR System (Applied Biosystems) to analyze  
298 relative gene expression levels using SYBR Green Master mix (Applied Biosystems)  
299 following manufacturer indications.

300 PCR amplification was performed as follows: 95°C 5 minutes, followed by 95°C for 10s,  
301 annealing at 60°C for 10s, followed by 45 cycles at 72°C for 10s. Melting curves were  
302 generated and tested for a single product after amplification. Expression of each target  
303 was calculated using the  $2^{-\Delta\Delta C_t}$  method and expressed as a relative mRNA expression.  
304 Relative expression values were normalized to the housekeeping gene GAPDH. qRT-  
305 PCR was done using reaction duplicates and three independent biological replicates  
306 were done for each analysis. Error bars indicate the mean  $\pm$  standard deviation.

307 The primers we used are:

308 DDX5, For: 5'-GCCGGGACCGAGGGTTTGGT-3', Rev: 5'-  
309 CTTGTGCTGTGCGCCTAGCCA-3'; AKT, For: 5'-TCTATGGCGCTGAGATTGTG-3',  
310 Rev: 5'-CTTAATGTGCCCGTCCTTGT-3'; G9a For: 5'-AGAGTGTGGACGGAGAGCTC-  
311 3' Rev: 5'-GGTCTCCCGCTTGAGGAT-3'; MyoD For: 5'-

312 CCGCCTGAGCAAAGTAAATGA-3'; Rev 5'-GCAACCGCTGGTTTGGATT-3'; RASSF4,  
313 For: 5'-AGTCCATTCAGAAGTCGGAGC-3'; Rev: 5'-CCCCAGGCAATGTTGAGGAG-3';  
314 PIPOX For: 5'-GGAGCAGTTCTTTCTACCACAC-3'; Rev: 5'  
315 TTCCCAGCAGCAGTAATCCA-3'; TFAP2B, For: 5'-TCAATGCATCTCTCCTCGGC-3';  
316 Rev:5'-CAGCTTCTCCTTCCACCAGG-  
317 3';MRAS,For:TGGCGACCAAACACAATATTCC; Rev: TCTCCCCGCCATTTGGTTTT-  
318 3';ABAT,For:5'-CTGCCTCCGGAGAACTTTGT-3';Rev:5'-  
319 TTTCCCTTGCTCCGGTACCAC-3'; BMP5 For: AATGCCACCAACCACGCTAT Rev: 5'-  
320 GCCACATGAGCGTACTACCA-3'; FGFR4, For: 5'-TGGCCGTCAAGATGCTCAAA-3';  
321 Rev:5'-GTACAGGGGCCCTTCCTGG-3';GAPDHFor:5'-  
322 TCTGGTAAAGTGGATATTGTTGCC-3'; Rev: 5'-CAAGCTTCCCGTTCTCAGCC-  
323 3';PAX3-FOXO1, For: 5'-AGACAGCTTTGTGCCTCCAT-3'; Rev: 5'-  
324 CTCTTGCCCTCCTCTGGATT-3'; myogenin, For: 5'-TCAACCAGGAGGAGCGTGA-3i;  
325 Rev: 5'-TGTAGGGTCAGCCGTGAGCA-3'

326

### 327 **Protein extraction and Western blotting**

328 Cells were harvested and centrifuged at 3000 rpm for 5 min at 4°C. Supernatant was  
329 then removed and cell pellet was resuspended in 1 ml of ice-cold PBS and centrifuged  
330 at 2000 rpm for 5 min at 4°C. After removing the supernatant, cell pellet was  
331 resuspended in lysis RIPA buffer supplemented with protease inhibitor cocktail and  
332 phosphatase inhibitors (Roche) and incubated in ice for 30 min. Samples were then  
333 sonicated in a water bath for 10 min (30 sec ON/ 30 sec OFF) and centrifuged at 15000  
334 rpm for 15 min at 4°C. Supernatant was then transferred in a new tube and proteins were  
335 quantified by BCA assay (Thermo Fisher Scientific) according to the manufacturer's  
336 protocol. Cell lysates were resolved on 4%-20% Mini-PROTEAN TGX gels (Bio-Rad  
337 Laboratories) and then transferred to nitrocellulose membrane (Amersham) using Trans-

338 Blot Turbo Transfer system (Bio-Rad Laboratories). Membranes were blocked with 5%  
339 nonfat dried milk in Tris-buffered saline/Tween (TBS-T; 0.1%) for 1 hours at room  
340 temperature with gentle shaking, followed by overnight incubation at 4°C with various  
341 antibodies. The primary antibodies we used were: DDX5 (Cell Signalling, #9877), G9a  
342 (Cell signalling, #3306), FOXO1 (Cell Signalling, #2880), p-AKT (Ser473) (Cell signaling,  
343 #4058), AKT (Cell signaling #4685) PARP (Cell signaling #9542), cleaved caspase 7  
344 (Cell signaling #8438), cleaved caspase 9 (Cell signaling #9505), MYOD (Santa Cruz  
345 Biotechnology, C-20), myogenin (DSHB, F5D), GAPDH (Sigma, G9545),  $\alpha$ -tubulin  
346 (Sigma-Aldrich, T5168). Membranes were then incubated with HRP-conjugated  
347 secondary antibodies (IgG-HRP Santa Cruz Biotechnologies) for 1 hour at RT and after  
348 incubation the blots were developed in an ECL detection solution (Clarity Max ECL  
349 substrate , Bio-Rad Laboratories) and signal was detected using ChemiDoc (BioRad  
350 Laboratories).

351

### 352 **Mouse xenograft experiments**

353 All animal procedures were approved by Italian Ministry of Health and Istituto Superiore  
354 di Sanità; approval number 7FF2C.7-EXT.9.

355 Female Balb/c nude mice (6/7 weeks old) were obtained from (Envigo) and maintained  
356 under specific pathogen-free conditions in a temperature- and humidity-controlled  
357 environment (Allevamenti Plaisant).  $2 \times 10^6$  shCTR and shDDX5 RH30 cells were  
358 injected subcutaneously into the flank of and, once tumors were palpable, they were  
359 measured every other day by measuring 2 diameters (d1 and d2) in right angles using a  
360 digital caliper. Total tumor volumes were then calculated by the formula  $V = (4/3)\pi r^3$ ;  $r =$   
361  $(d1 + d2)/4$ . On day 21 after the injections, mice were euthanized and resected tumors  
362 were fixed in formalin or immersed in liquid nitrogen and stored at -80 degrees. For  
363 western analysis tumors were disrupted with a mortar and pestle, followed by sonication

364 in RIPA buffer supplemented with proteinase and phosphatase inhibitors (Roche).  
365 Formalin-fixed tumor tissues were embedded in paraffin and and sections were stained  
366 with hematoxylin and eosin using standard techniques (data not shown). Tissue sections  
367 were deparaffinized, rehydrated, and heated at 95°C for 20 min in pH 6 antigen retrieval  
368 buffer. Slides were blocked and incubated with Ki67 antibody (Abcam 15580) overnight  
369 at 4°C, then incubated with the secondary antibody (Alexa Fluor 488, Thermo Fisher  
370 Scientific). Nuclei were counterstained with DAPI (Sigma). Images were acquired using  
371 Axio Observer 443 microscope (ZEISS) and analyzed by ZEN 3.0 (Blue edition)  
372 software.

373

#### 374 **Co-immunoprecipitation**

375 Co-immunoprecipitation was carried out through magnetic separation. RH30 and RH41  
376 cells were centrifuged at 1200 rpm for 5 min at 4°C, resuspended in lysis buffer (10 mM  
377 Tris pH 8, 10 mM NaCl, 0.1 mM EDTA pH 8, 0.1 mM EGTA) with protease inhibitor  
378 (Roche) and then incubated on ice for 30 min. A dounce homogenizer was used to  
379 mechanically help cell lysis. 10% NP-40 was added to a final concentration of 0,5% and  
380 then samples were vortexed and incubated on ice 2-3 min. Samples were then  
381 centrifuged at 4000 rpm for 5 min at 4°C in order to pellet nuclei. Nuclei were  
382 resuspended in nuclei lysis buffer (20 mM Tris pH 8, 400 mM NaCl, 1 mM EDTA pH 8,  
383 1 mM EGTA) with protease inhibitor (Roche) and incubated for 10 min on ice to increase  
384 lysis efficiency. Lysates were then sonicated for 10 min (30 sec On/30 sec OFF at high  
385 intensity) and then centrifuged at top speed for 20 min at 4°C. Supernatant, containing  
386 nuclear extract (NE), was then transferred into a new tube: 50  $\mu$ l on NE was saved to  
387 use as input and to quantify NE concentration. NE was then precleared with 10  $\mu$ l protein  
388 A/G magnetic beads (Thermo Fisher Scientific), washed with IP lysis buffer (50 mM Tris  
389 pH 8, 150 mM NaCl, 1 mM EDTA pH 8, 1 mM EGTA) for 2 hrs at 4°C on rotating wheel.



390 After preclearing, NE were diluted 1:5 in IP buffer with protease inhibitor (Roche). NE  
391 was incubated overnight at 4°C on rotating wheel with 10 ug of G9a antibody (Abcam,  
392 ab185050). The following day we added pre-blocked protein A/G magnetic beads  
393 (Thermo Fisher Scientific) to each sample and incubated for 2 hrs at 4°C on rotating  
394 wheel. Samples were then washed six times, one wash every 5 min, with IP buffer. At  
395 the end, beads were separated on a magnet and the immunocomplexes were  
396 resuspended with IP buffer and LSB buffer (Biorad Laboratories) for further analysis.

397

## 398 **RNA-Sequencing**

### 399 **RNAseq in siDDX5 FP-RMS**

400 Total RNA was extracted and quantified as previously described. RNA-Seq libraries  
401 preparation and sequencing was performed by the IGA Technology Services (Udine,  
402 Italy) using the Illumina TruSeq Stranded mRNA Kit (Illumina, San Diego, CA) according  
403 to manufacturer's instructions. The final libraries for paired-end sequencing of 150 base  
404 pairs were carried out on an Illumina NovaSeq6000 (Illumina, San Diego, CA) with an  
405 average of 55 million of reads per sample. Processing raw data for both format  
406 conversion and de-multiplexing were performed by *Bcl2Fastq* version 2.20 of the Illumina  
407 pipeline. Reads quality was evaluated using *FastQC* (version 0.11.8, Babraham Institute  
408 Cambridge, UK) tool, then adapter sequences were masked with *Cutadapt* version 1.11  
409 from raw fastq data using the following parameters: *--anywhere* (on both adapter  
410 sequences) *--overlap 5 --times 2 --minimum-length 35 --mask-adapter*.

411 Reads were mapped to the human Ensembl GRCh38 transcriptome index (release 96)  
412 using *kallisto* (version 0.46.0) (28). The following flags were used for *kallisto*: *-b 30 --*  
413 *bias*. Gene-level normalization and differential gene expression analysis were performed  
414 using Bioconductor (29) R (version 3.6.2) (R Core Team, 2015) package *DESeq2*  
415 version 1.26 (30) accounting for the presence of batch effects. The figures were obtained

416 using the *R* environment with package *ggplot2* version 3.3.0 and *heatmap* version  
417 1.0.12.

418

#### 419 **RNAseq in shG9a FP-RMS**

420 RNA-seq libraries from total RNA (100 ng) from each sample were prepared using  
421 QuantSeq 3'mRNA-Seq Library prep kit (Lexogen, Vienna, Austria) according to  
422 manufacturer's instructions, at Telethon Institute of Genetics and Medicine (TIGEM). The  
423 amplified fragmented cDNA of 300 bp in size were sequenced in single-end mode using  
424 the NextSeq500 (Illumina) with a read length of 75 bp. Reads quality was evaluated  
425 using *FastQC* (version 0.11.8, Babraham Institute Cambridge, UK) tool and was trimmed  
426 using *TrimGalore* software to remove adapter and low-quality bases ( $Q < 20$ ). Then  
427 reads were mapped to the human Ensembl GRCh38 build reference genome using  
428 *STAR* version 2.5.0a (31) using Gene annotations corresponding to the Ensembl  
429 annotation release 96 which was used to build a transcriptome index and provided to  
430 *STAR* during the alignment.

431 The same gene annotations were used to quantify the gene-level read counts using  
432 *HTSeq-count* version 0.8.0 (32) script, subsequently the data normalization and  
433 differential analysis for gene expression were performed using Bioconductor (29) *R*  
434 package *edgeR* version 3.28 (33).

435

#### 436 **Gene set enrichment analysis**

437 In order to understand biological meaning of the differentially expressed genes the  
438 resulting filtered (Benjamini-Hochberg false discovery rate (FDR) adjusted for multiple  
439 hypothesis testing  $p$ -value  $< 0.05$ ) genes were clustered by functional annotation using  
440 Bioconductor *R* package *clusterProfiler* version 3.14 (34) with annotation of Gene  
441 Ontology Database (35) and with annotation of Kyoto Encyclopedia of Genes and  
442 Genomes (KEGG) (36) for pathways. Gene Set Enrichment Analysis (GSEA) (37) with

443 pre-ranked, “classic” mode with 10,000 permutations was used to assess the enrichment  
444 of the gene profile of siDDX5 or shG9a samples compared to control samples in the  
445 curated “hallmark” and “C2” gene set collections (BROAD molecular signature database,  
446 MSigDb version 6.2).

447

#### 448 **Data availability**

449 RNA-Seq data accompanying this paper are available through NCBI’s Gene Expression  
450 Omnibus (GEO) repository, under accession number GSE152358 and GSE152359.

451

#### 452 **Statistical analysis**

453 Data were analyzed using Prism (version 6.0; GraphPad Software Inc.), and images  
454 were compiled in Photoshop (version 6.0; Adobe Systems). Results are presented as  
455 mean  $\pm$  SD from at least 3 independent experiments. Statistical analysis was conducted  
456 using an unpaired Student’s *t*-test, one-way ANOVA or 2-way ANOVA. *P* value of less  
457 than 0.05 was considered statistically significant. \**P* < 0.05; \*\**P* < 0.01; \*\*\**P* < 0.001;  
458 \*\*\*\**P* < 0.0001.

459

#### 460 **Author Contributions**

461 A.G. performed all the experiments, collected and analysed data and prepared figures.  
462 V.L. performed bioinformatic analyses. C.M. conceived, supervised the project and wrote  
463 the manuscript. All authors discussed results, reviewed and edited the manuscript.

464

#### 465 **Acknowledgements**

466 This work was supported by the Italian Association for Cancer Research (AIRC;  
467 MyFIRST grant n.18993) and the CNCCS (Collection of National Chemical Compounds  
468 and Screening Center). We would like to thank Marco Pezzullo and Cristiano De Stefanis

469 (core facilities, Bambino Gesù Children's Hospital, Rome, Italy) for the technical FFPE  
470 tissues preparation.

471

## 472 Declaration of Interests

473 The authors declare no competing interests.

## 474 References

- 475 1. Hettmer S, Li Z, Billin AN, Barr FG, Cornelison DD, Ehrlich AR, et al.  
476 Rhabdomyosarcoma: current challenges and their implications for developing  
477 therapies. *Cold Spring Harb Perspect Med.* 2014;4(11):a025650.
- 478 2. El Demellawy D, McGowan-Jordan J, de Nanassy J, Chernetsova E, and Nasr A.  
479 Update on molecular findings in rhabdomyosarcoma. *Pathology.*  
480 2017;49(3):238-46.
- 481 3. Wachtel M, and Schafer BW. PAX3-FOXO1: Zooming in on an "undruggable"  
482 target. *Semin Cancer Biol.* 2018;50:115-23.
- 483 4. Seki M, Nishimura R, Yoshida K, Shimamura T, Shiraishi Y, Sato Y, et al. Integrated  
484 genetic and epigenetic analysis defines novel molecular subgroups in  
485 rhabdomyosarcoma. *Nat Commun.* 2015;6:7557.
- 486 5. Kohsaka S, Shukla N, Ameer N, Ito T, Ng CK, Wang L, et al. A recurrent  
487 neomorphic mutation in MYOD1 defines a clinically aggressive subset of  
488 embryonal rhabdomyosarcoma associated with PI3K-AKT pathway mutations.  
489 *Nat Genet.* 2014;46(6):595-600.
- 490 6. Shern JF, Chen L, Chmielecki J, Wei JS, Patidar R, Rosenberg M, et al.  
491 Comprehensive genomic analysis of rhabdomyosarcoma reveals a landscape of  
492 alterations affecting a common genetic axis in fusion-positive and fusion-  
493 negative tumors. *Cancer Discov.* 2014;4(2):216-31.
- 494 7. Gryder BE, Yohe ME, Chou HC, Zhang X, Marques J, Wachtel M, et al. PAX3-  
495 FOXO1 Establishes Myogenic Super Enhancers and Confers BET Bromodomain  
496 Vulnerability. *Cancer Discov.* 2017;7(8):884-99.
- 497 8. Linder P, and Jankowsky E. From unwinding to clamping - the DEAD box RNA  
498 helicase family. *Nat Rev Mol Cell Biol.* 2011;12(8):505-16.
- 499 9. Caretti G, Schiltz RL, Dilworth FJ, Di Padova M, Zhao P, Ogryzko V, et al. The RNA  
500 helicases p68/p72 and the noncoding RNA SRA are coregulators of MyoD and  
501 skeletal muscle differentiation. *Dev Cell.* 2006;11(4):547-60.
- 502 10. Dardenne E, Polay Espinoza M, Fattet L, Germann S, Lambert MP, Neil H, et al.  
503 RNA helicases DDX5 and DDX17 dynamically orchestrate transcription, miRNA,  
504 and splicing programs in cell differentiation. *Cell Rep.* 2014;7(6):1900-13.
- 505 11. Yang L, Lin C, and Liu ZR. Phosphorylations of DEAD box p68 RNA helicase are  
506 associated with cancer development and cell proliferation. *Mol Cancer Res.*  
507 2005;3(6):355-63.
- 508 12. Shin S, Rossow KL, Grande JP, and Janknecht R. Involvement of RNA helicases  
509 p68 and p72 in colon cancer. *Cancer Res.* 2007;67(16):7572-8.

- 510 13. Nyamao RM, Wu J, Yu L, Xiao X, and Zhang FM. Roles of DDX5 in the  
511 tumorigenesis, proliferation, differentiation, metastasis and pathway regulation  
512 of human malignancies. *Biochim Biophys Acta Rev Cancer*. 2019;1871(1):85-98.
- 513 14. Stewart E, McEvoy J, Wang H, Chen X, Honnell V, Ocarz M, et al. Identification of  
514 Therapeutic Targets in Rhabdomyosarcoma through Integrated Genomic,  
515 Epigenomic, and Proteomic Analyses. *Cancer Cell*. 2018;34(3):411-26 e19.
- 516 15. Ernst J, and Kellis M. ChromHMM: automating chromatin-state discovery and  
517 characterization. *Nat Methods*. 2012;9(3):215-6.
- 518 16. Skapek SX, Ferrari A, Gupta AA, Lupo PJ, Butler E, Shipley J, et al.  
519 Rhabdomyosarcoma. *Nat Rev Dis Primers*. 2019;5(1):1.
- 520 17. Cox AD, Fesik SW, Kimmelman AC, Luo J, and Der CJ. Drugging the undruggable  
521 RAS: Mission possible? *Nat Rev Drug Discov*. 2014;13(11):828-51.
- 522 18. Yohe ME, Gryder BE, Shern JF, Song YK, Chou HC, Sindiri S, et al. MEK inhibition  
523 induces MYOG and remodels super-enhancers in RAS-driven  
524 rhabdomyosarcoma. *Sci Transl Med*. 2018;10(448).
- 525 19. Laplante M, and Sabatini DM. mTOR signaling in growth control and disease. *Cell*.  
526 2012;149(2):274-93.
- 527 20. Zhang X, Tang N, Hadden TJ, and Rishi AK. Akt, FoxO and regulation of apoptosis.  
528 *Biochim Biophys Acta*. 2011;1813(11):1978-86.
- 529 21. Xue Y, Jia X, Li L, Dong X, Ling J, Yuan J, et al. DDX5 promotes hepatocellular  
530 carcinoma tumorigenesis via Akt signaling pathway. *Biochem Biophys Res  
531 Commun*. 2018;503(4):2885-91.
- 532 22. Bhat AV, Palanichamy Kala M, Rao VK, Pignata L, Lim HJ, Suriyamurthy S, et al.  
533 Epigenetic Regulation of the PTEN-AKT-RAC1 Axis by G9a Is Critical for Tumor  
534 Growth in Alveolar Rhabdomyosarcoma. *Cancer Res*. 2019;79(9):2232-43.
- 535 23. Legrand JMD, Chan AL, La HM, Rossello FJ, Anko ML, Fuller-Pace FV, et al. DDX5  
536 plays essential transcriptional and post-transcriptional roles in the maintenance  
537 and function of spermatogonia. *Nat Commun*. 2019;10(1):2278.
- 538 24. Fiszbein A, Giono LE, Quagliano A, Berardino BG, Sigaut L, von Bilderling C, et al.  
539 Alternative Splicing of G9a Regulates Neuronal Differentiation. *Cell Rep*.  
540 2016;14(12):2797-808.
- 541 25. Cornett EM, Ferry L, Defossez PA, and Rothbart SB. Lysine Methylation  
542 Regulators Moonlighting outside the Epigenome. *Mol Cell*. 2019;75(6):1092-101.
- 543 26. Ren YX, Finckenstein FG, Abdueva DA, Shahbazian V, Chung B, Weinberg KI, et  
544 al. Mouse mesenchymal stem cells expressing PAX-FKHR form alveolar  
545 rhabdomyosarcomas by cooperating with secondary mutations. *Cancer Res*.  
546 2008;68(16):6587-97.
- 547 27. Davicioni E, Finckenstein FG, Shahbazian V, Buckley JD, Triche TJ, and Anderson  
548 MJ. Identification of a PAX-FKHR gene expression signature that defines  
549 molecular classes and determines the prognosis of alveolar  
550 rhabdomyosarcomas. *Cancer Res*. 2006;66(14):6936-46.
- 551 28. Bray NL, Pimentel H, Melsted P, and Pachter L. Near-optimal probabilistic RNA-  
552 seq quantification. *Nat Biotechnol*. 2016;34(5):525-7.
- 553 29. Gentleman RC, Carey VJ, Bates DM, Bolstad B, Dettling M, Dudoit S, et al.  
554 Bioconductor: open software development for computational biology and  
555 bioinformatics. *Genome Biol*. 2004;5(10):R80.

- 556 30. Love MI, Huber W, and Anders S. Moderated estimation of fold change and  
557 dispersion for RNA-seq data with DESeq2. *Genome Biol.* 2014;15(12):550.
- 558 31. Dobin A, Davis CA, Schlesinger F, Drenkow J, Zaleski C, Jha S, et al. STAR: ultrafast  
559 universal RNA-seq aligner. *Bioinformatics.* 2013;29(1):15-21.
- 560 32. Anders S, Pyl PT, and Huber W. HTSeq--a Python framework to work with high-  
561 throughput sequencing data. *Bioinformatics.* 2015;31(2):166-9.
- 562 33. Robinson MD, McCarthy DJ, and Smyth GK. edgeR: a Bioconductor package for  
563 differential expression analysis of digital gene expression data. *Bioinformatics.*  
564 2010;26(1):139-40.
- 565 34. Yu G, Wang LG, Han Y, and He QY. clusterProfiler: an R package for comparing  
566 biological themes among gene clusters. *OMICS.* 2012;16(5):284-7.
- 567 35. Ashburner M, Ball CA, Blake JA, Botstein D, Butler H, Cherry JM, et al. Gene  
568 ontology: tool for the unification of biology. The Gene Ontology Consortium. *Nat*  
569 *Genet.* 2000;25(1):25-9.
- 570 36. Ogata H, Goto S, Sato K, Fujibuchi W, Bono H, and Kanehisa M. KEGG: Kyoto  
571 Encyclopedia of Genes and Genomes. *Nucleic Acids Res.* 1999;27(1):29-34.
- 572 37. Subramanian A, Tamayo P, Mootha VK, Mukherjee S, Ebert BL, Gillette MA, et al.  
573 Gene set enrichment analysis: a knowledge-based approach for interpreting  
574 genome-wide expression profiles. *Proc Natl Acad Sci U S A.* 2005;102(43):15545-  
575 50.
- 576



# FIGURE 1

bioRxiv preprint doi: <https://doi.org/10.1101/2020.07.08.194092>; this version posted July 10, 2020. The copyright holder for this preprint (which was not certified by peer review) is the author/funder, who has granted bioRxiv a license to display the preprint in perpetuity. It is made available under aCC-BY-NC-ND 4.0 International license.

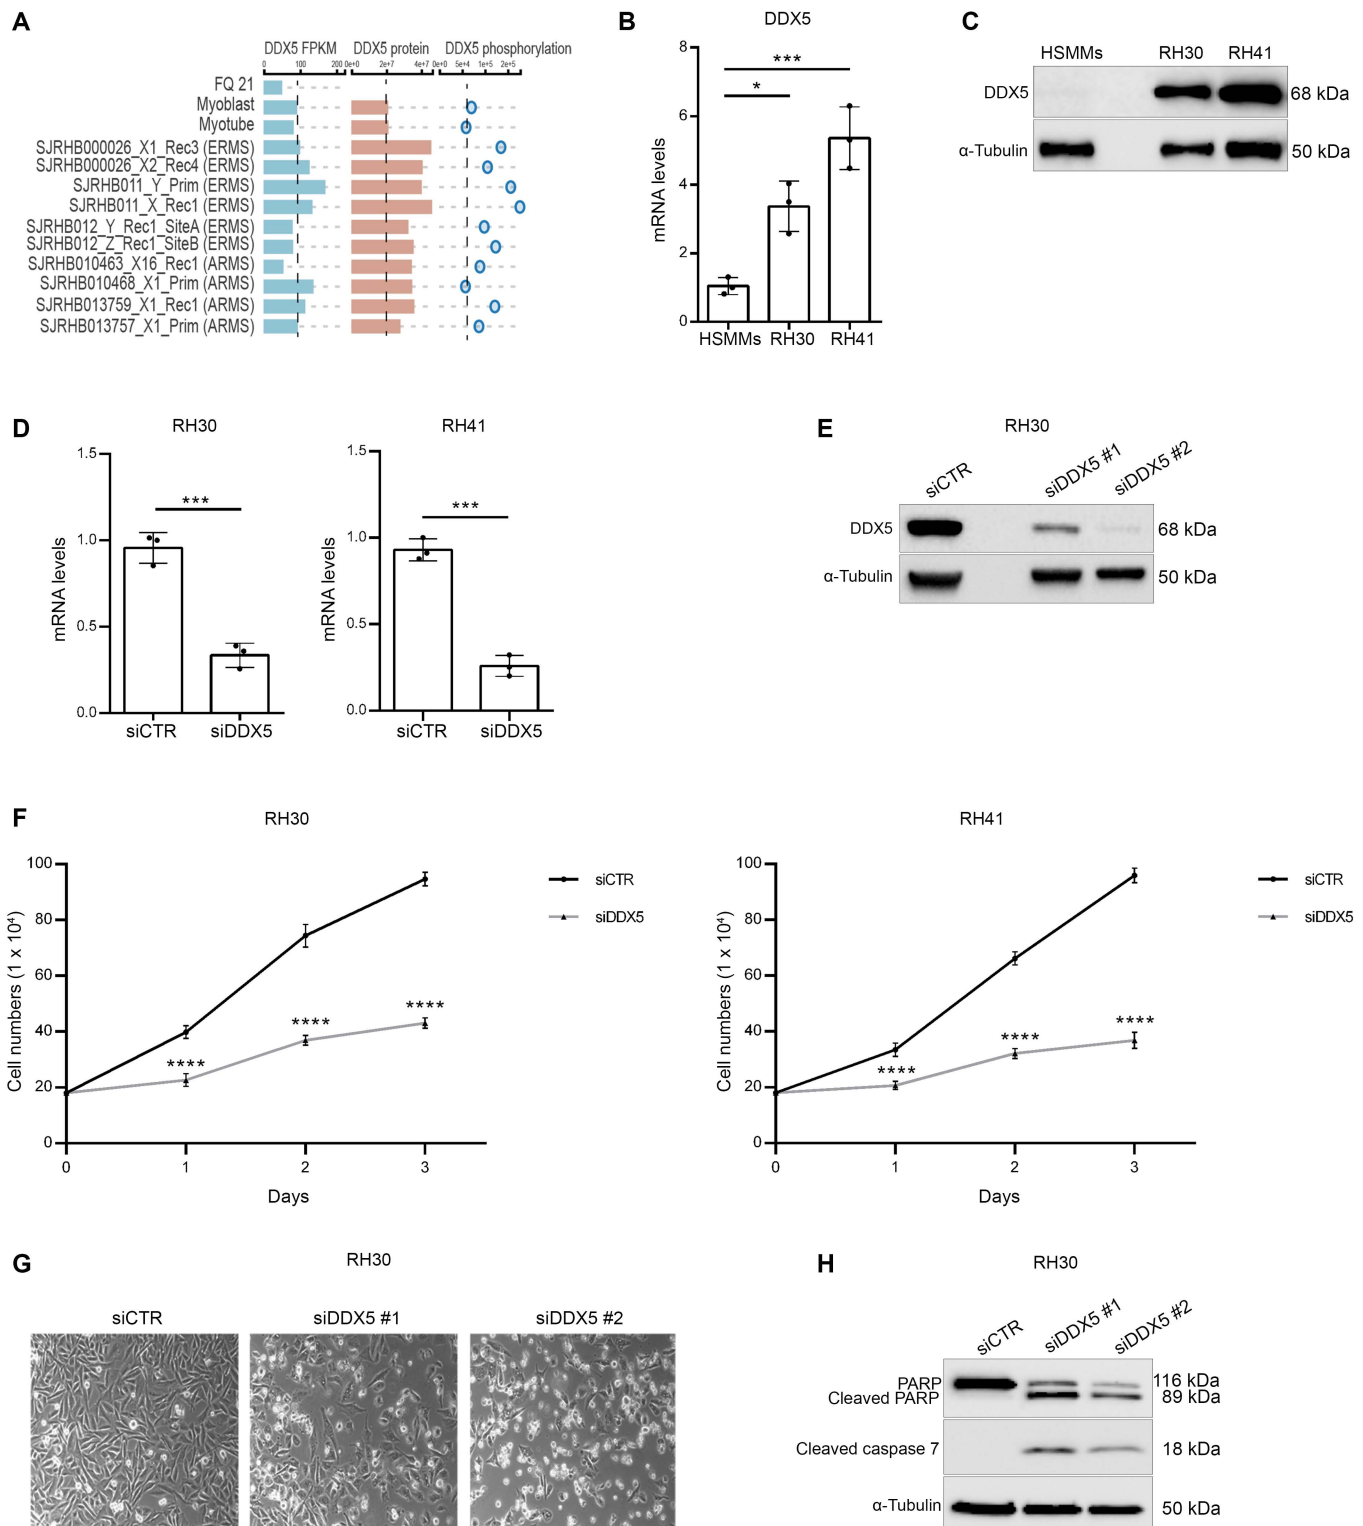

**Figure 1. DDX5 is overexpressed in alveolar rhabdomyosarcoma and promotes FP-ARMS survival**

(A) RNA (FPKM; blue bars) and protein levels (red bars), together with phosphorylation status (blue circles) of DDX5 in orthotopic RMS patient-derived xenografts (PDX), as compared to normal myoblasts and myotubes. Data derive from <https://pecan.stjude.cloud/proteinpaint/study/RHB2018> (14). (B) Histogram showing the relative mRNA expression levels of DDX5 in RH30 and RH41 cell lines and human skeletal muscle myoblasts (HSMMs). Transcription values were assessed by qRT-PCR and normalized to GAPDH. Graph represents mean  $\pm$  SD from n=3 independent experiments. (C) Representative western blot analysis for DDX5 in RH30 and RH41 cell lines and HSMMs.  $\alpha$ -tubulin was used as a loading control. (D) qRT-PCR analysis of DDX5 mRNA levels in RH30 (left) and RH41 (right) cell lines, after siCTR and siDDX5 treatment. Graphs show mean  $\pm$  SD from n=3 independent experiments. (E) Western blot analysis for DDX5 in RH30 cells treated with siCTR, and two different sequences for DDX5 (siDDX5 #1 and #2). Normalization with  $\alpha$ -tubulin. (F) Cells growth curves after siDDX5 treatment. Cells were counted 1, 2 and 3 days after treatment. Graphs show mean  $\pm$  SD from n=3 independent experiments. (G) Representative phase contrast images of RH30 cells 3 days after siDDX5 treatment. (H) Western blot analysis for indicated proteins performed on RH30 after siDDX5 and siCTR treatment.  $\alpha$ -tubulin was used as control of loading normalization. Statistical significance has been assessed in (B) by one-way ANOVA with Bonferroni multiple comparisons test. \*  $p < 0.05$ ; \*\*\* $p < 0.001$ ; (D) by an unpaired Student's t-test; \*\*\*  $p < 0.001$ ; and (F) with 2-way anova with Sidak's multiple comparison test, .\*\*\* $p < 0.001$  test.



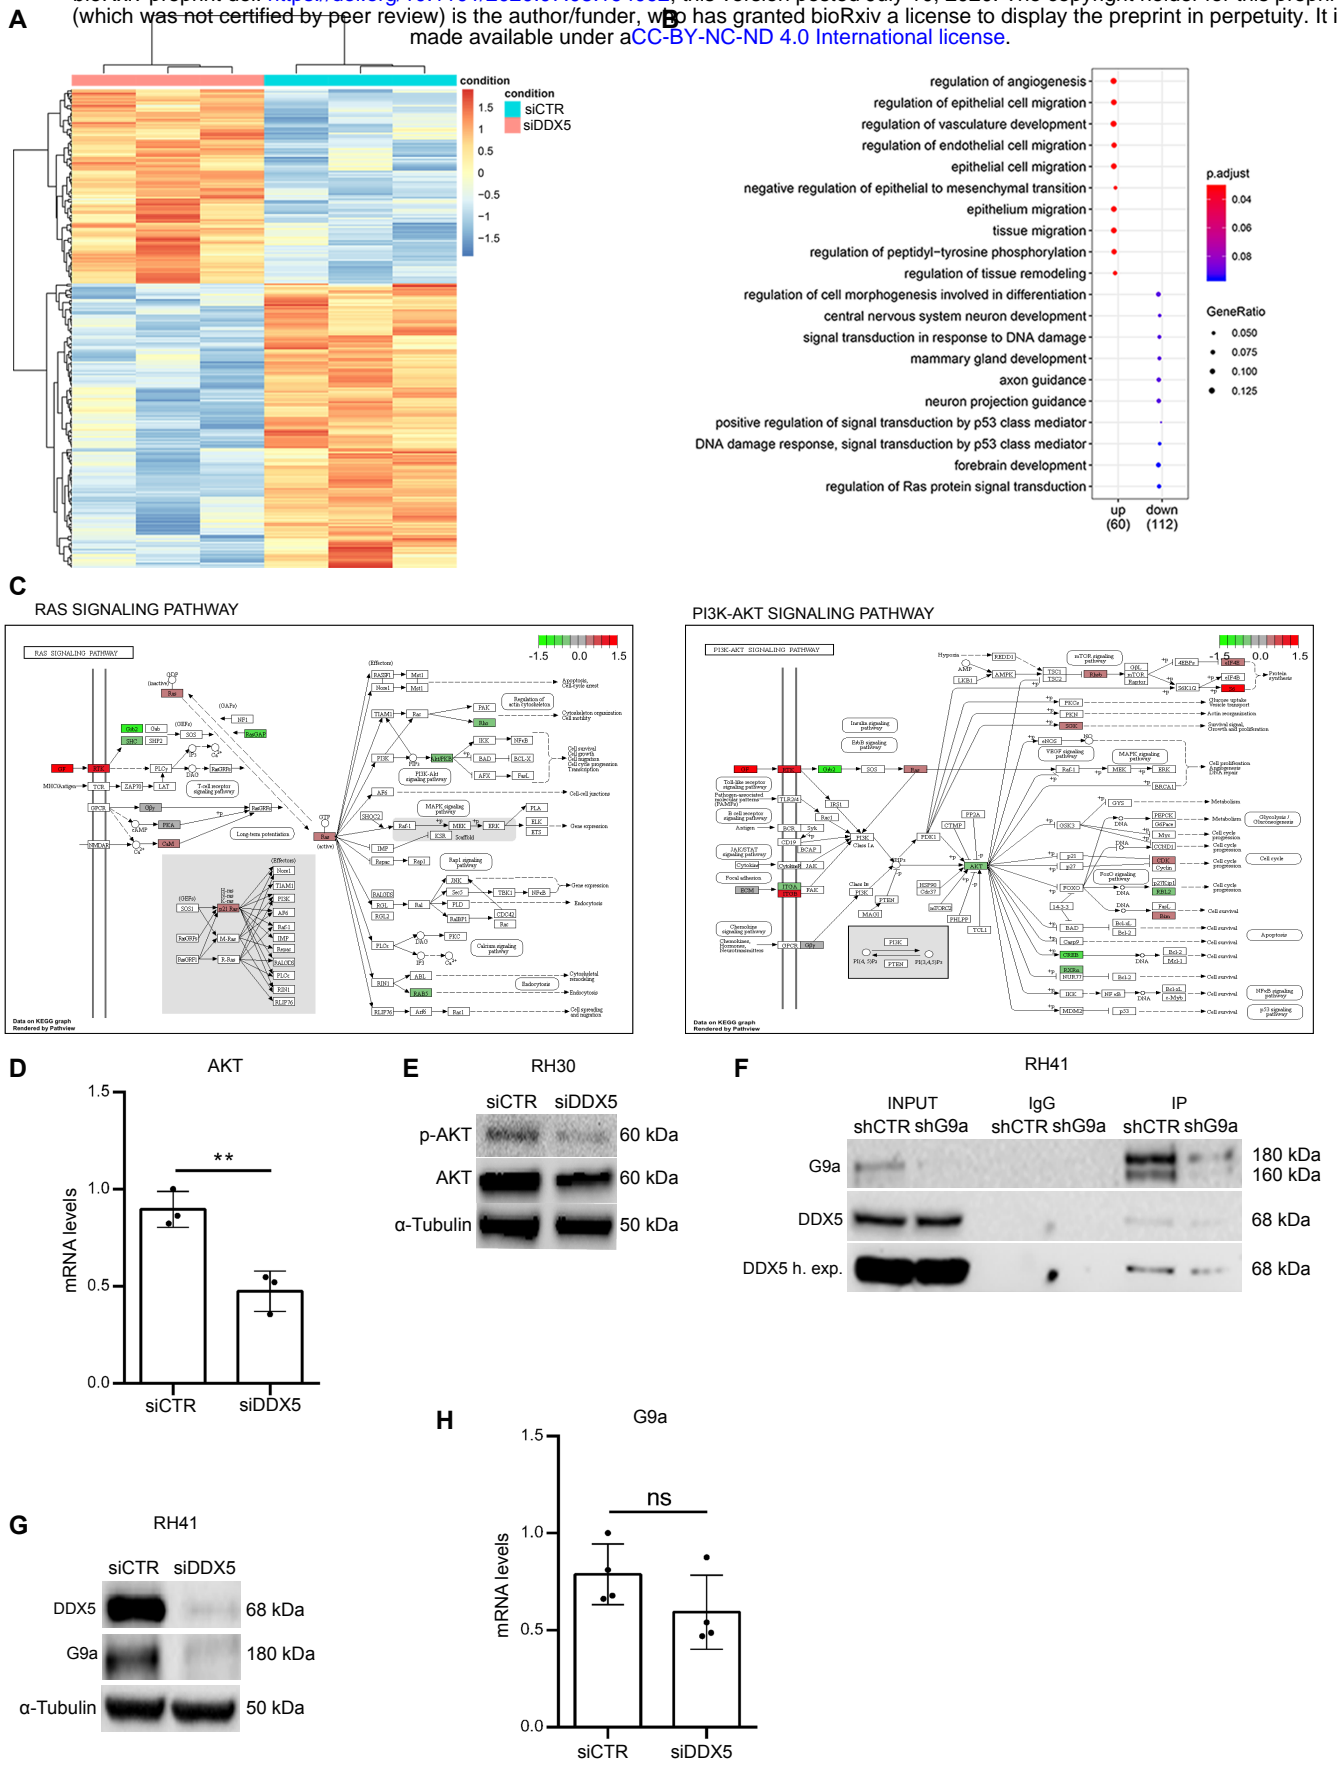

**Figure 2 DDX5 interacts with G9a and regulates G9a-AKT signaling**

(A) Heatmap plot of hierarchical clustering of all differentially expressed genes (DEGs). The X axis represents the two compared samples (siCTR and siDDX5). The Y axis represents the DEGs. The color (from blue to red) represents gene expression intensity from low to high. Red indicates upregulated and blue represents downregulated genes. DEGs were selected according to  $FC > 1.5$  and  $p_{adj} < 0.05$ . (B) Dot plot showing the up and down regulated GO terms of biological processes identified. The size of the dot is based on gene count enriched in the pathway, and the color of the dot shows the pathway enrichment significance. (C) KEGG analysis of Ras (left) and PI3K-AKT (right) signaling pathways. (D) AKT mRNA levels quantified by qRT-PCR after DDX5 silencing in RH30 cells, as compared to siCTR cells. Transcription values were assessed by qRT-PCR and normalized to GAPDH. Graph represents mean  $\pm$  SD from n=3 independent experiments. Statistical significance was assessed by unpaired Student's t-test,  $p < 0.01$ . (E) Western blot analysis of p-AKT and AKT in siCTR and siDDX5 RH30 cells. Normalization with  $\alpha$ -tubulin (F) Representative western blot analysis of the indicated proteins in G9a immunoprecipitation in nuclear extracts of control (shCTR) and shG9a-treated RH41 cells (last two right lanes). Equal amounts of nuclear extracts were immunoprecipitated with IgG as negative control. Inputs are shown on the left. (G) Western blot analysis for G9a and DDX5 in RH30 cells treated with siCTR and siDDX5.  $\alpha$ -tubulin was used as loading control. (H) qRT-PCR for G9a in siCTR and siDDX5 RH30 cells. Graph shows the mean  $\pm$  SD value derived from n=4 independent experiments. Statistical significance has been assessed by an unpaired Student's t-test;  $p > 0,05$  (no statistical significance, ns).

**FIGURE 3**

bioRxiv preprint doi: <https://doi.org/10.1101/2020.07.08.194092>; this version posted July 10, 2020. The copyright holder for this preprint (which was not certified by peer review) is the author/funder, who has granted bioRxiv a license to display the preprint in perpetuity. It is made available under aCC-BY-NC-ND 4.0 International license.

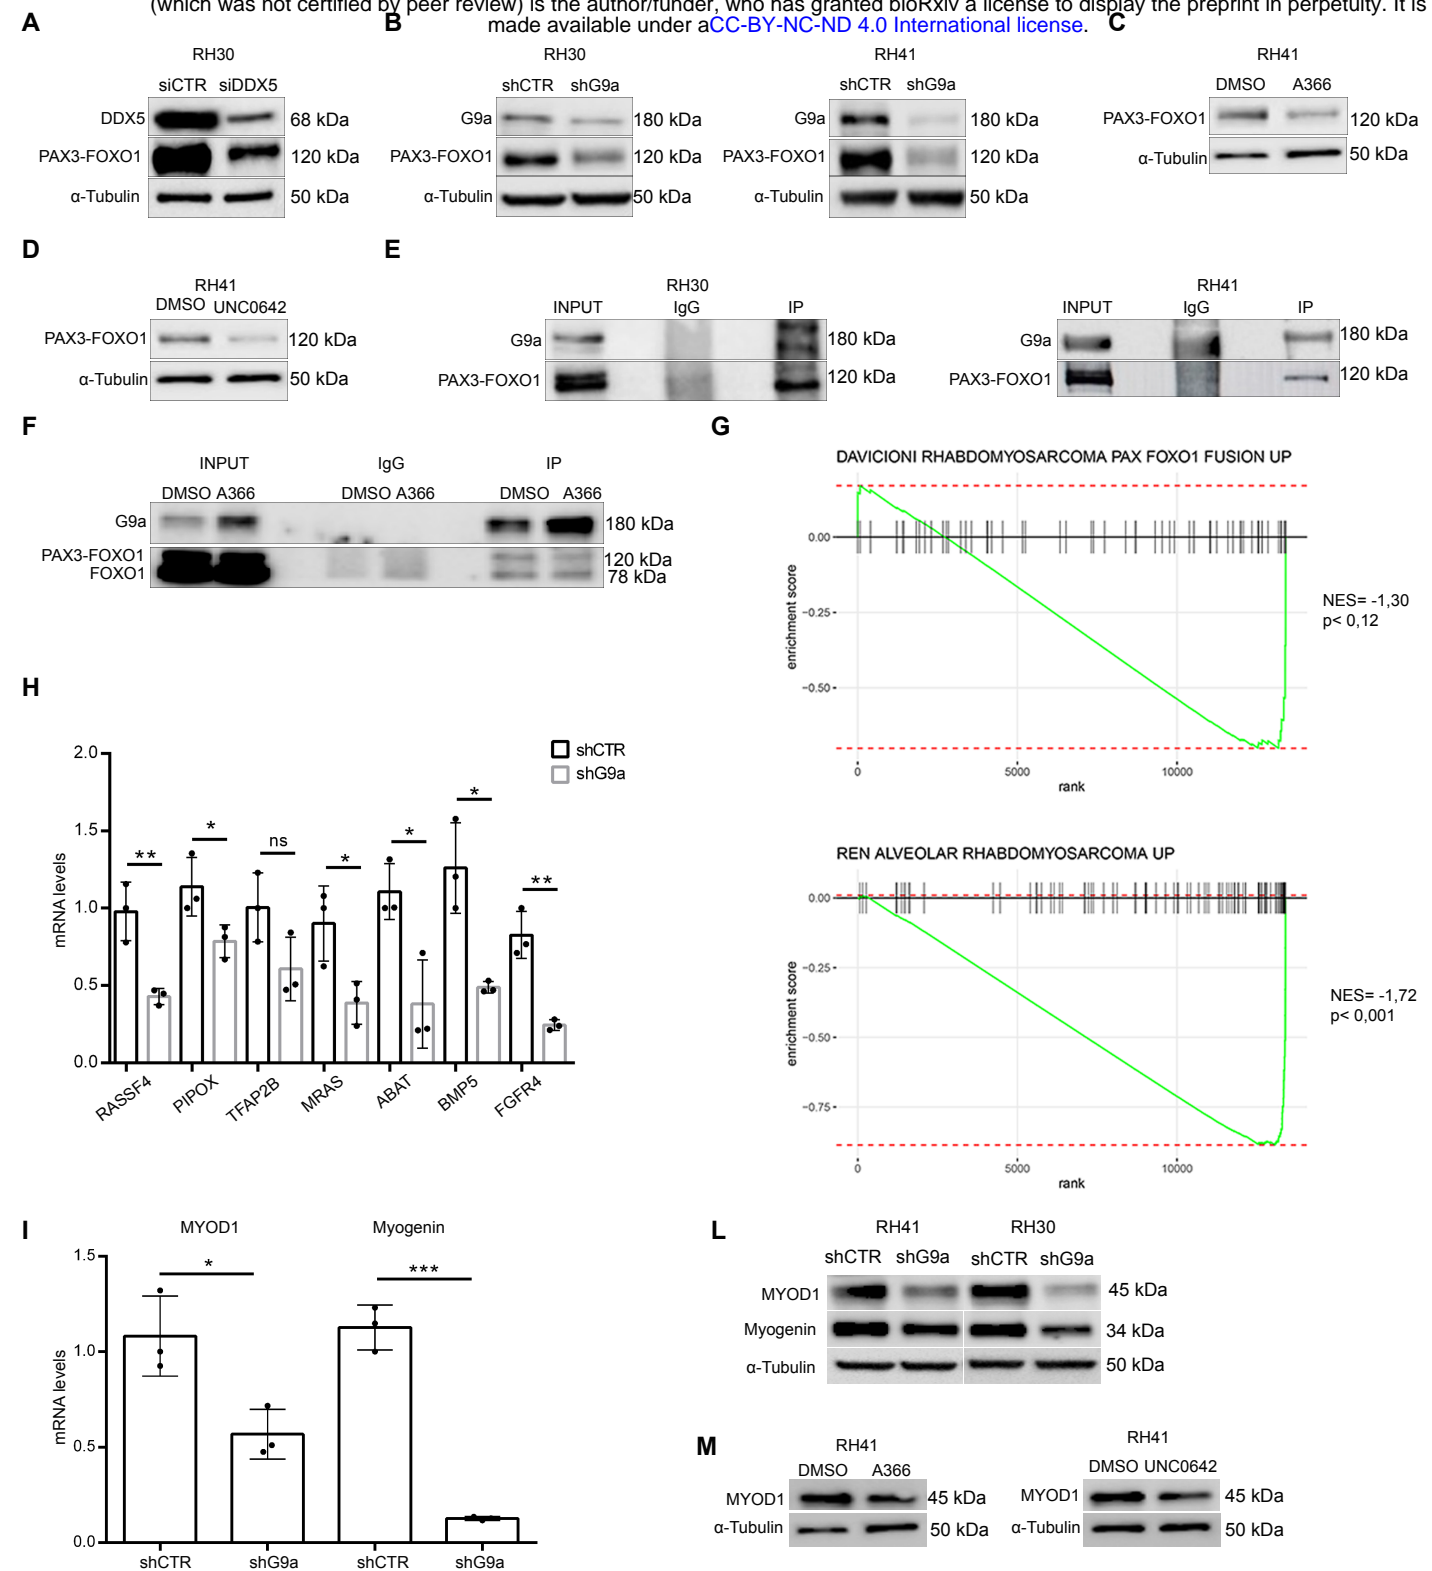

**Figure 3**  
**DDX5 and G9a regulate PAX3-FOXO1 expression**

(A) Western blot analysis for DDX5 and PAX3-FOXO1 in RH30 cells treated with siCTR and siDDX5.  $\alpha$ -Tubulin shown as loading control. (B) Western blot for G9a and PAX3-FOXO1 in RH30 (left) and RH41 (right) cells treated with shCTR and shG9a.  $\alpha$ -Tubulin shown as loading control. (C-D) Western blot for PAX3-FOXO1 in RH41 cells treated with 10  $\mu$ M A366 (C) and 2  $\mu$ M UNC0642 (D) for six days. Control cells were treated with DMSO and all samples were normalized with  $\alpha$ -Tubulin. (E) Western blot analysis of G9a immunoprecipitation in RH30 (left) and RH41 (right) cells. PAX3-FOXO1 is detected in the G9a immunoprecipitates, but not in the IgG negative control. Input are shown on the left. (F) Western blot analysis for G9a and PAX3-FOXO1 in RH41 cells treated with A-366 as indicated in (C) and immunoprecipitated for G9a. IgG were used as a negative control. (G) GSEA of RNA-seq performed in shCTR and shG9a RH41 cells, on genes found upregulated by PAX3-FOXO1, using two different data sets (27) and (26). (H) Validation of the indicated PAX3-FOXO1 target genes by qRT-PCR in shCTR and shG9a cells. Transcription values were normalized to GAPDH. Graphs show the mean  $\pm$  SD from n=3 independent experiments. (I) mRNA levels of MYOD1 and myogenin quantified by qRT-PCR after shG9a treatment in RH41 and RH30 cells. Transcription values were normalized to GAPDH. Graphs show the mean  $\pm$  SD from n=3 independent experiments. (L) Western blot analysis for MYOD1 and Myogenin in RH41 and RH30 cells after shCTR and shG9a.  $\alpha$ -tubulin was used for normalization. (M) Western blot of MYOD and MYOG protein levels in RH41 cells treated with 10  $\mu$ M A366 or with 2  $\mu$ M UNC0642 for six days.  $\alpha$ -tubulin was used for normalization. Statistical significance has been assessed in (H) and (I) by unpaired Student's t-test; (\* p < 0.05, \*\* p < 0.01, \*\*\* p < 0.001, ns > 0.05).

**FIGURE 4**

bioRxiv preprint doi: <https://doi.org/10.1101/2020.07.08.194092>; this version posted July 10, 2020. The copyright holder for this preprint (which was not certified by peer review) is the author/funder, who has granted bioRxiv a license to display the preprint in perpetuity. It is made available under aCC-BY-NC-ND 4.0 International license.

**A**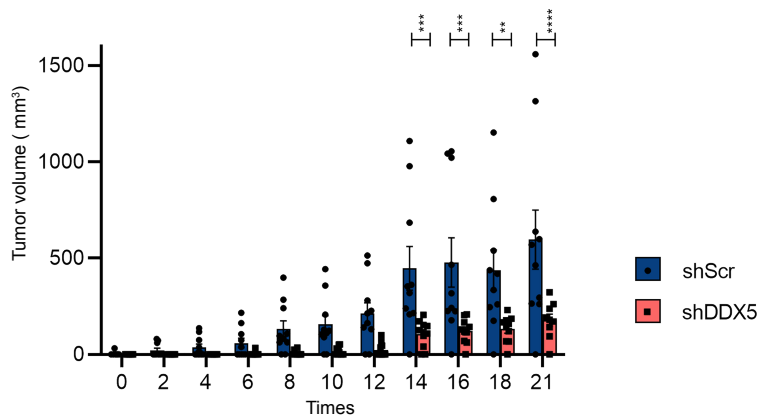**B**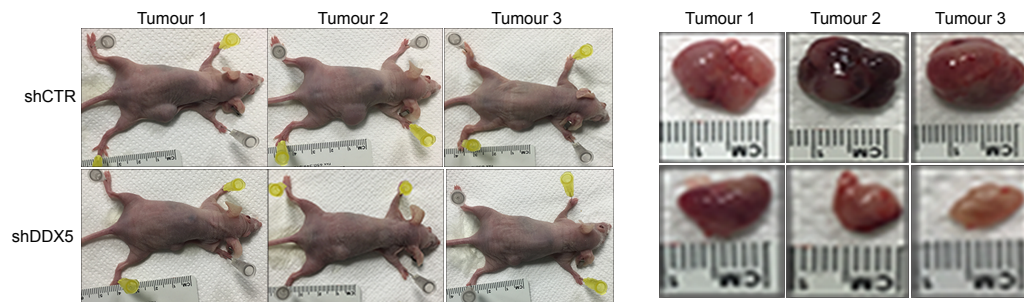**C**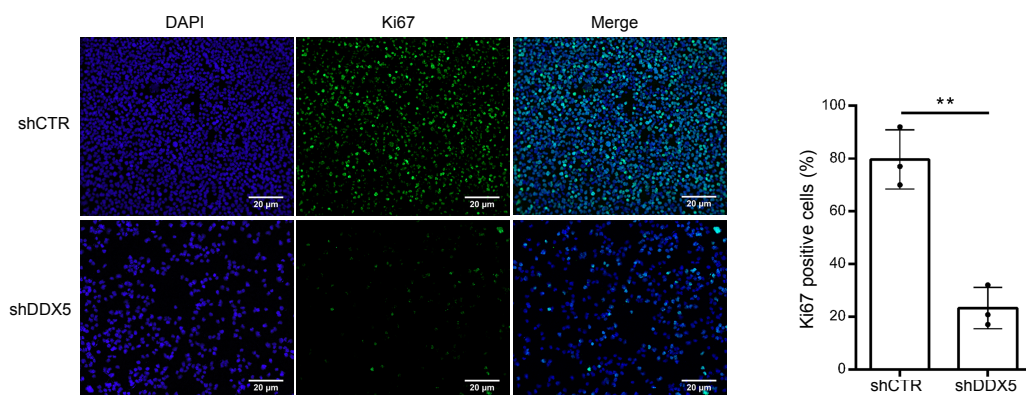**D**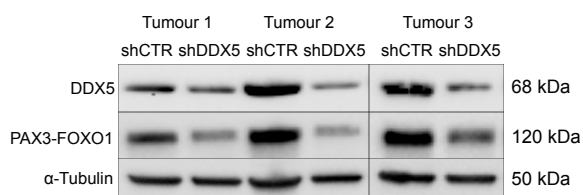**E**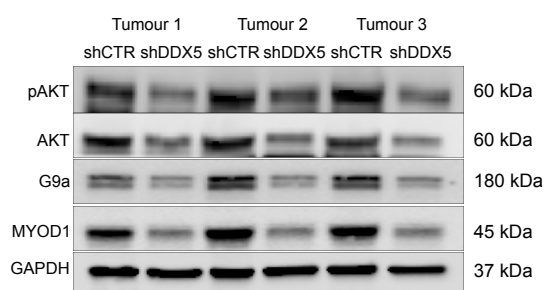

**Figure 4**  
**DDX5 promotes FP-RMS growth in vivo.**

(A) Bar charts represent tumor volumes in sCTR and shDDX5 treated mice from day of injection (day 0) to day of tumor resection (day 21). Data are presented as mean  $\pm$  sem of  $n=10$  mice/experimental group. Statistical significance assessed by 2-way Anova, with Sidak's multiple comparison test. \*\*  $p < 0.01$ , \*\*\*  $p < 0.001$ , \*\*\*\*  $p < 0.0001$ . (B) Three representative shCTR and shDDX5 treated mice and matching resected tumors at day 21. (C) Representative images of Ki67 immunostaining (green) on isolated shCTR and shDDX5 tumors. DAPI (blue) was used to stain nuclei. Scale bars: 20  $\mu$ m. Histogram (on the right) shows quantification of the percentage of Ki67+ cells. Data are represented as mean  $\pm$  sd of  $n=3$  independent tumors. (D-E) Western blot analysis for the indicated protein on extracts derived from  $n=3$  tumors/experimental group.  $\alpha$ -tubulin and GAPDH were used for normalization.

# Supplemental Figure 1

bioRxiv preprint doi: <https://doi.org/10.1101/2020.07.08.194092>; this version posted July 10, 2020. The copyright holder for this preprint (which was not certified by peer review) is the author/funder, who has granted bioRxiv a license to display the preprint in perpetuity. It is made available under aCC-BY-NC-ND 4.0 International license.

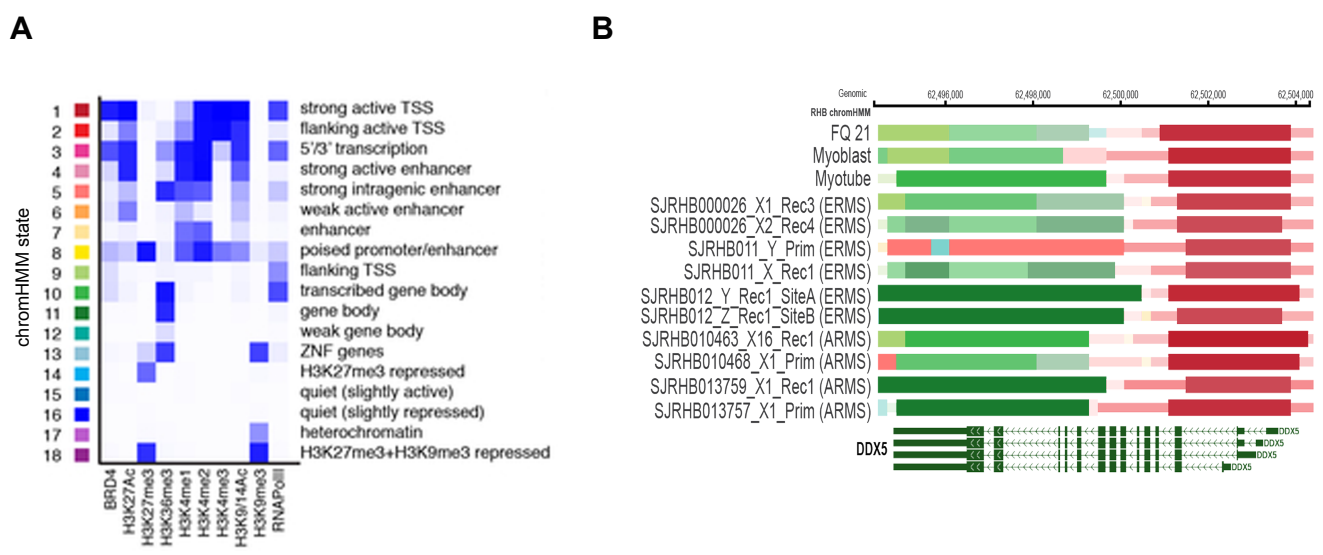

**Supplemental Figure 1**

(A) Legend of the 18 chromatin hidden Markov modeling (chromHMM) states (15) identified in the study (14). (B) ChromHMM state of DDX5 in RMS patient-derived xenografts (PDX) from ERMS and ARMS, as compared to normal myoblasts and myotubes. The bars show a strong active transcription start site (TSS) (red bars) and an actively transcribed gene body (green bars) in either normal myoblasts and myotubes, and primary ERMS and ARMS samples.

**A**

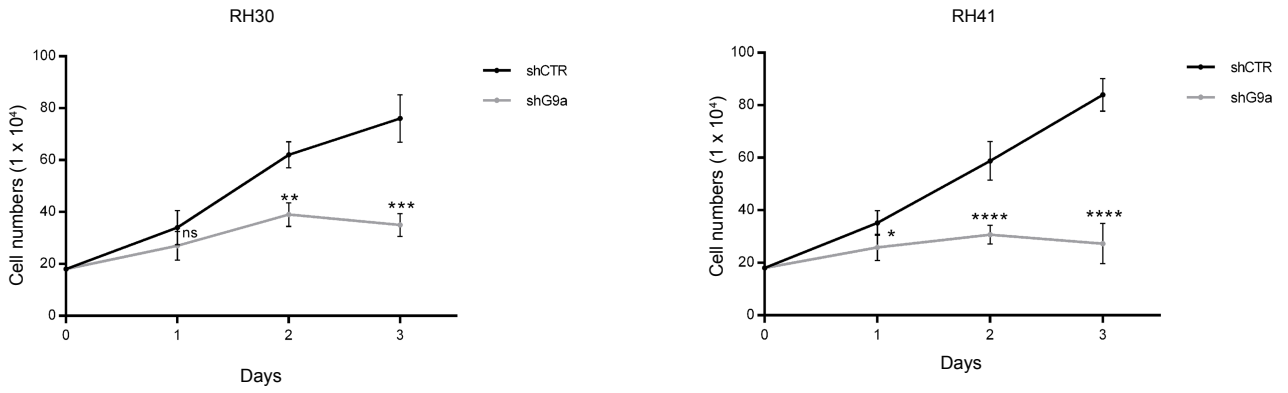

**B**

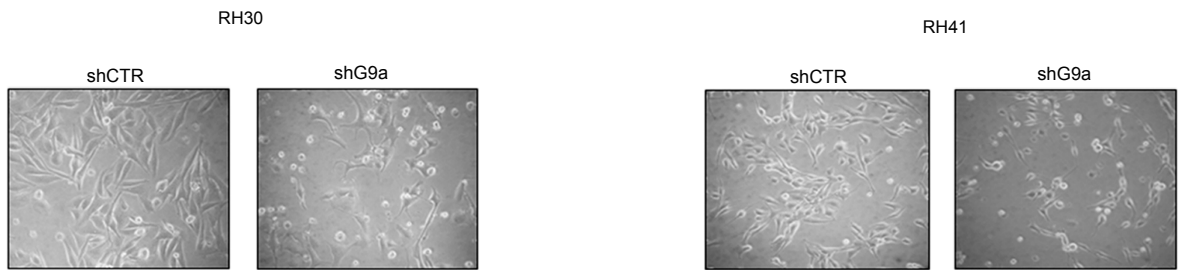

**C**

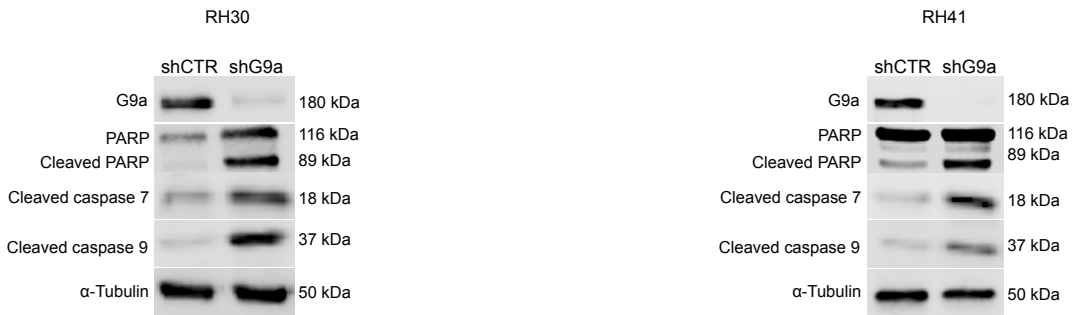

**Supplemental Figure 2**

(A) RH30 and RH41 cells growth curves after shCTR and shG9a treatment. Cells were counted 1, 2 and 3 days after treatment. Graphs show mean +/- SD from n=3 independent experiments. Statistical significance has been assessed by 2-way Anova, with Sidak's multiple comparison test. \*\* p<0.01, \*\*\* p<0.001, \*\*\*\* p<0.0001. (B) Representative phase contrast images of RH30 (left) and RH41 (right), shCTR and shG9a, analyzed after 3 days after treatment. (C) Western blot of G9a, cleaved PARP, cleaved caspase 7 and cleaved caspase 9 from extracts of RH30 and RH41 cells 3 days after shG9a silencing. Normalization with α-tubulin.

# Supplemental Figure 3

bioRxiv preprint doi: <https://doi.org/10.1101/2020.07.08.194092>; this version posted July 10, 2020. The copyright holder for this preprint (which was not certified by peer review) is the author/funder, who has granted bioRxiv a license to display the preprint in perpetuity. It is made available under aCC-BY-NC-ND 4.0 International license.

**A**

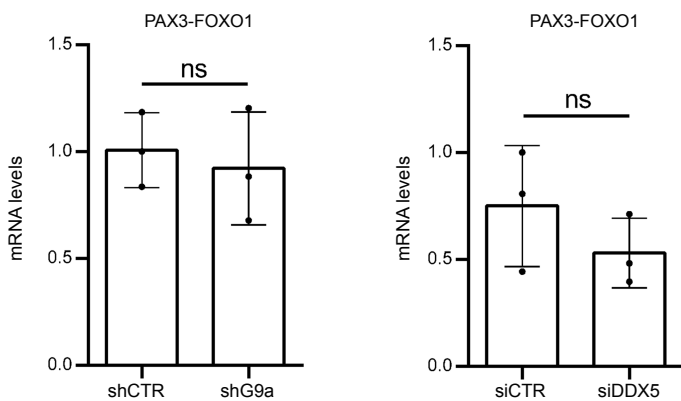

**B**

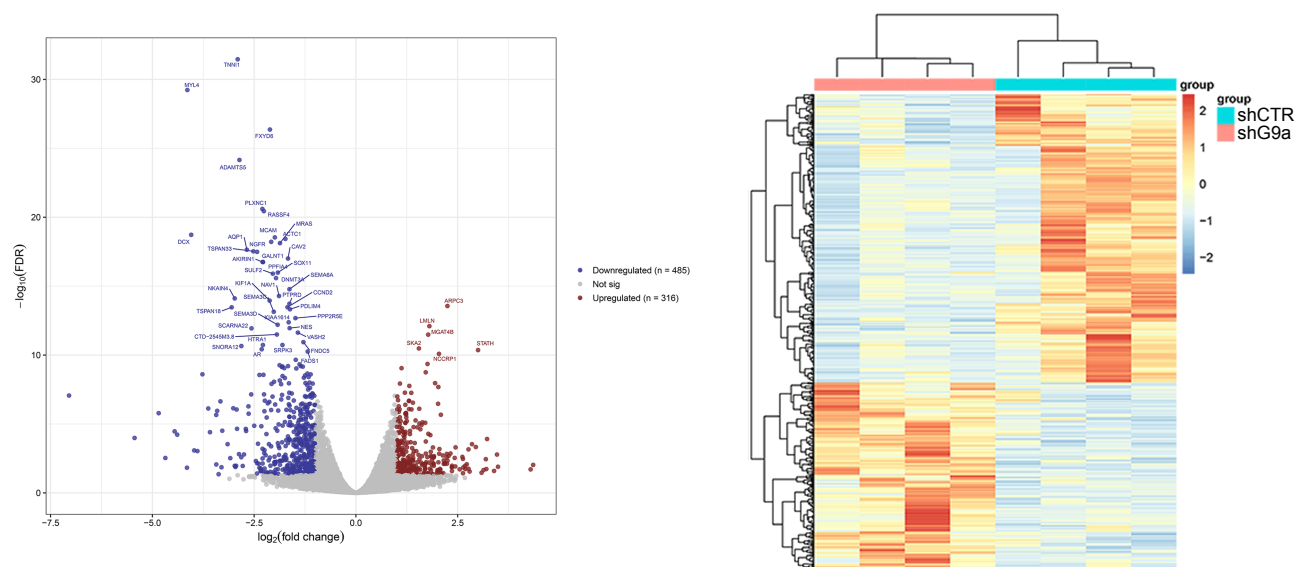

**C**

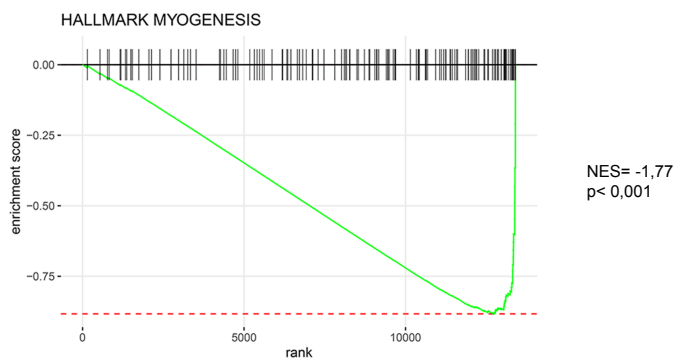

## Supplemental Figure 3

(A) qRT-PCR of PAX3-FOXO1 in shG9a and siDDX5 treatments. Graphs show the mean  $\pm$  SD values from n=3 independent experiments. Statistical significance has been assessed by an unpaired Student's t-test;  $p > 0,05$  (no statistical significance, ns). (B) RNA-seq analysis after G9a knockdown. Volcano plot of shG9a vs shCTR in RH41 cells (left) showing differentially expressed genes (DEGs) (downregulated genes are highlighted in blue and upregulated genes are red). Heatmap of DEGs in RH41 cells 72h after transfection (right). RNAseq analysis was performed for genes that are regulated by G9a at the transcript-level with more than two-fold regulation (Foldchange > 2 and FDR < 0.05). (C) GSEA of RNA-seq performed in shCTR and shG9a RH41 cells, on "Myogenesis" signature.
